# Supplementary material for: Breast cancer patients from the Midwest region of the United States have reduced levels of short-chain fatty acid-producing gut bacteria
Source: PubMed Central journal article supplement (PMC9834383; doi:10.1038/s41598-023-27436-3), 2023-01-11
Supplement: 41598_2023_27436_MOESM1_ESM.pdf [file 41598_2023_27436_MOESM1_ESM.pdf]

## **Supplementary Information**

### **Breast cancer patients from the Midwest region of the United States have reduced levels of short-chain fatty acid-producing gut bacteria**

**Rachel L. Shrode<sup>1, +</sup>, Jessica E. Knobbe<sup>2,3,4, +</sup>, Nicole Cady<sup>5,6, +</sup>, Meeta Yadav<sup>5,7</sup>, Jemmie Hoang<sup>8</sup>, Catherine Cherwin<sup>8</sup>, Melissa Curry<sup>9</sup>, Rohan Garje<sup>10</sup>, Praveen Vikas<sup>10</sup>, Sonia Sugg<sup>11</sup>, Sneha Phadke<sup>12</sup>, Edward Filardo<sup>13</sup>, and Ashutosh K. Mangalam<sup>1,2,5,7\*</sup>**

| <b>Supplementary Table 1</b> |                                     | <b>Adjusted p-value</b> |              | <b>Identified in</b> |                      |
|------------------------------|-------------------------------------|-------------------------|--------------|----------------------|----------------------|
|                              | <b>Species</b>                      | <b>p-value</b>          | <b>(FDR)</b> | <b>BC vs HC</b>      | <b>random forest</b> |
|                              | <i>Faecalibacterium prausnitzii</i> | 0.000277                | 0.031578     | Decreased            | yes                  |
|                              | <i>Intestinibacter bartlettii</i>   | 0.00232                 | 0.13224      | Increased            | yes                  |
|                              | <i>Parabacteroides merdae</i>       | 0.0036                  | 0.1368       | Decreased            | yes                  |
|                              | <i>Oscillibacter species</i>        | 0.00791                 | 0.1368       | Decreased            | yes                  |
|                              | <i>Alistipes species</i>            | 0.00963                 | 0.1368       | Decreased            | no                   |
|                              | <i>Eggerthella lenta</i>            | 0.0103                  | 0.1368       | Increased            | no                   |
|                              | <i>Lachnoclostridium edouardi</i>   | 0.0104                  | 0.1368       | Decreased            | no                   |
|                              | <i>Lachnospiraceae</i>              | 0.0104                  | 0.1368       | Decreased            | no                   |
|                              | <i>UCG 010 species</i>              |                         |              |                      |                      |
|                              | <i>Faecalitalea species</i>         | 0.0113                  | 0.1368       | Increased            | yes                  |
|                              | <i>Lachnospira pectinoschiza</i>    | 0.0121                  | 0.1368       | Decreased            | no                   |
|                              | <i>Erysipelotrichaceae</i>          | 0.0141                  | 0.1368       | Decreased            | no                   |
|                              | <i>UCG 003 bacterium</i>            |                         |              |                      |                      |
|                              | <i>Blautia species</i>              | 0.0144                  | 0.1368       | Increased            | no                   |
|                              | <i>Oscillospiraceae species</i>     | 0.0167                  | 0.13842857   | Increased            | yes                  |
|                              | <i>Actinomyces species</i>          | 0.017                   | 0.13842857   | Increased            | yes                  |

**Supplementary Table 1** The species significantly different between BC and HC.

**Supplementary Table 2**

|                                                          |                | <b>Adjusted</b> |                 |
|----------------------------------------------------------|----------------|-----------------|-----------------|
|                                                          |                | <b>p-value</b>  |                 |
|                                                          |                |                 | <b>(FDR)</b>    |
| <b>Pathway</b>                                           | <b>p-value</b> |                 | <b>BC vs HC</b> |
| TCA_cycle_VIII_helicobacter                              | 0.000326       | 0.108884        | increased       |
| dTDP_N_acetylthomosamine_biosynthesis                    | 0.001          | 0.11133333      | increased       |
| beta__1.4_mannan_degradation                             | 0.001          | 0.11133333      | decreased       |
| superpathway_of_2.3_butanediol_biosynthesis              | 0.00134        | 0.11189         | increased       |
| superpathway_of_L_alanine_biosynthesis                   | 0.00232        | 0.11743871      | increased       |
| superpathway_of__R.R_butanediol_biosynthesis             | 0.00389        | 0.11743871      | increased       |
| L_arginine_biosynthesis_III__via_N_acetyl_L_citrulline   | 0.00423        | 0.11743871      | decreased       |
| methanogenesis_from_acetate                              | 0.0046         | 0.11743871      | increased       |
| pyrimidine_deoxyribonucleosides_salvage                  | 0.0046         | 0.11743871      | decreased       |
| superpathway_of_N_acetylglucosamine.                     | 0.00635        | 0.11743871      | increased       |
| _N_acetylmannosamine_and_N_acetylneuraminate_degradation |                |                 |                 |
| FUCCAT_PWY                                               | 0.00688        | 0.11743871      | increased       |
| superpathway_of_demethylmenaquinol_6_biosynthesis_I      | 0.00688        | 0.11743871      | increased       |
| superpathway_of_demethylmenaquinol_9_biosynthesis        | 0.00688        | 0.11743871      | increased       |
| X8_amino_7_oxonanoate_biosynthesis_I                     | 0.00688        | 0.11743871      | decreased       |
| tetrapyrrole_biosynthesis_I__from_glutamate              | 0.00743        | 0.11743871      | increased       |
| queuosine_biosynthesis                                   | 0.00743        | 0.11743871      | decreased       |
| biotin_biosynthesis_I                                    | 0.00803        | 0.11743871      | decreased       |
| superpathway_of_menaquinol_9_biosynthesis                | 0.00803        | 0.11743871      | increased       |
| superpathway_of_menaquinol_6_biosynthesis_I              | 0.00803        | 0.11743871      | increased       |
| superpathway_of_menaquinol_10_biosynthesis               | 0.00803        | 0.11743871      | increased       |
| pyrimidine_deoxyribonucleotides_de_novo_biosynthesis_IV  | 0.00803        | 0.11743871      | increased       |

|                                                             |         |            |           |
|-------------------------------------------------------------|---------|------------|-----------|
| fatty_acid_elongation____saturated                          | 0.00867 | 0.11743871 | decreased |
| polyisoprenoid_biosynthesis__E._coli                        | 0.00867 | 0.11743871 | decreased |
| pyrimidine_deoxyribonucleotides_biosynthesis_from_CTP       | 0.00867 | 0.11743871 | decreased |
| glycerol_degradation_to_butanol                             | 0.00936 | 0.11743871 | increased |
| incomplete_reductive_TCA_cycle                              | 0.0101  | 0.11743871 | decreased |
| guanosine_nucleotides_degradation_III                       | 0.0101  | 0.11743871 | increased |
| thiazole_biosynthesis_II__aerobic_bacteria                  | 0.0101  | 0.11743871 | increased |
| CMP_3_deoxy_D_manno_octulosonate_biosynthesis               | 0.0109  | 0.11743871 | decreased |
| gondoate_biosynthesis__anaerobic                            | 0.0109  | 0.11743871 | decreased |
| mycolate_biosynthesis                                       | 0.0109  | 0.11743871 | decreased |
| oleate_biosynthesis_IV__anaerobic                           | 0.0117  | 0.1186579  | decreased |
| reductive_TCA_cycle_I                                       | 0.0126  | 0.1186579  | increased |
| peptidoglycan_maturation__meso_diaminopimelate_containing   | 0.0126  | 0.1186579  | increased |
| X_5Z_dodecenoate_biosynthesis_I                             | 0.0126  | 0.1186579  | decreased |
| heme_b_biosynthesis_II__anaerobic                           | 0.0135  | 0.1186579  | increased |
| stearate_biosynthesis_II__bacteria_and_plants               | 0.0135  | 0.1186579  | decreased |
| palmitoleate_biosynthesis_I__from__5Z_dodec_5_enoate        | 0.0135  | 0.1186579  | decreased |
| superpathway_of_fatty_acid_biosynthesis_initiation__E._coli | 0.0145  | 0.121075   | decreased |
| pyruvate_fermentation_to_propanoate_I                       | 0.0145  | 0.121075   | decreased |
| glucose_and_glucose_1_phosphate_degradation                 | 0.0156  | 0.12708293 | increased |
| purine_nucleobases_degradation_I__anaerobic                 | 0.0179  | 0.14234762 | increased |
| gluconeogenesis_I                                           | 0.0192  | 0.14913488 | decreased |

---

**Supplementary Table 2** The functional pathways significantly different between BC and HC.

**Supplementary Figure 1**

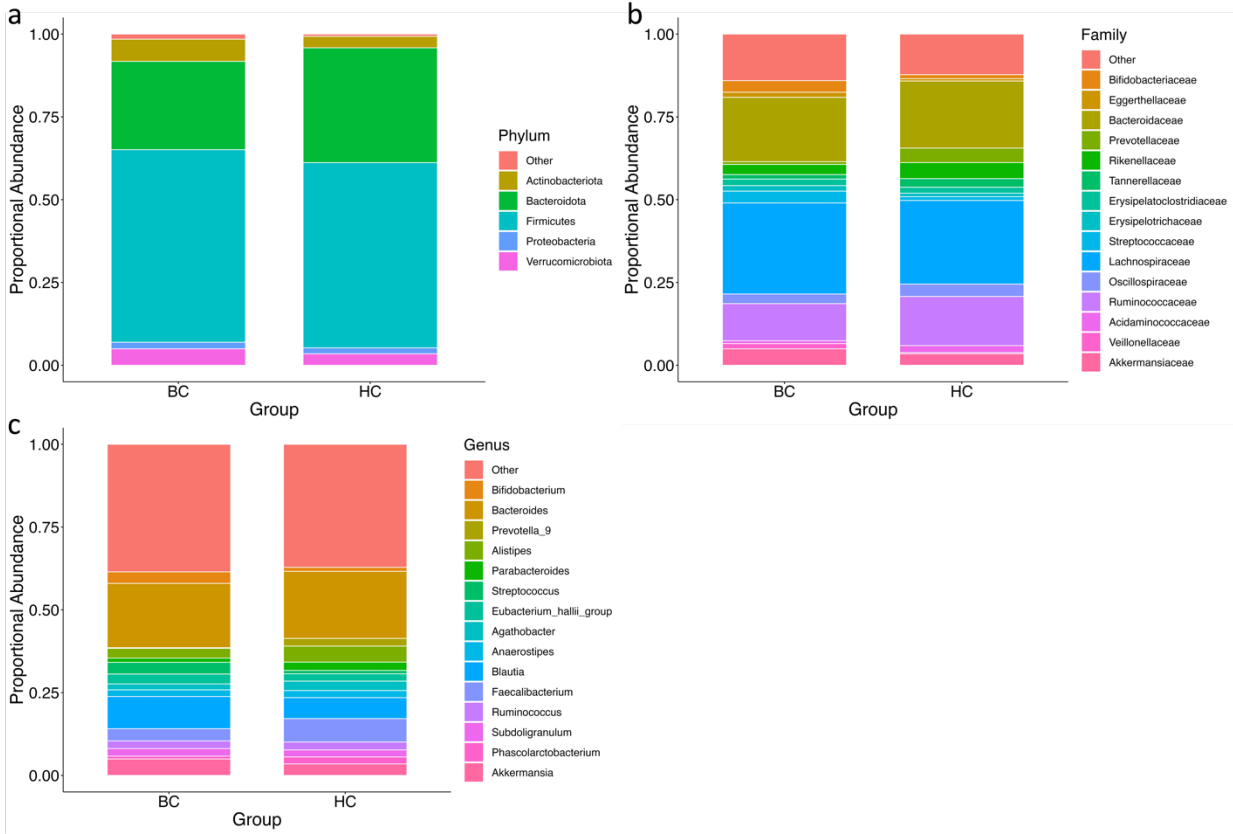

**Supplementary Figure 1** The most abundant a) phylum, b) families, and c) genera within the two cohorts.
